# Supplementary material
Source: PubMed Central journal article supplement (PMC4298509)
Supplement: JCM.02254-14_zjm999094040so1.pdf [file JCM.02254-14_zjm999094040so1.pdf]

# Supplemental Text

## Full-length sequence of HTLV-1 provirus integrated in TL-Om1 cells

Size : 8941 bps

TGACAATGACCATGAGCCCAATATCCCCCGGGGCTTAGAGCCTCTAGTGAAAAACATTTCCGCGAAACAGAAGTCTGAAAAGGTGAGGGCCAGACTA  
AGGCTCTGACGTCTCCCCCGGAGGGACAGCTCAGCACCGGCTCAGGCTAGGCCCTGACGTGTCCCCCTGAAGACAAATCATAAGCTCAGACCTCCGGGA  
AGCCACCGGAACCCCAATTTCCCTCCCATGTTTGTAAAGCCGCCCTCAGGCGTTGACGACAACCCCTCACCTCAAAAAAATTTTCATGGCAGCATATGCG  
TGAATAAATACAGGAGTCTATAAAAGCGTGGAGACAGTTTACGAGGAGGCTCGCATCTCTCTTACGCGCCCGCCGCTTACCTGAGCGCCATCA  
CGCCGGTTGAGTCGCTTCTGCCGCTCCCGCTGTGGTGCCTCTGAACCTCGCTCCGCGCTAGGTAAGTTTAGAGCTCAGGTCGAGACCGGGCTTT  
GTCCGCGCTCCTTGGAGCTACCTAGACTCAGCCGCTCCACGCTTTGCCCTGACCTGTCTCAACTCTCGCTCTTGTTCGTTTTCTGTTCTGC  
GTCCGTACAGATGGAAGTTCCACCCCTTCCCTTTCATTACAGACTGACTGCCGCTTGGCCACGGCCAAAGTACCGGACTCCGTTGGCTGGAGCCA  
GGACAGCCCATCTATAGCACTCTCCAGGAGAGAACTTAGTACACAGTTGGGGGCTCGCCGGGATACGAGCGCCCTTTATCCCTAGGCAATGGGCCA  
AACCTTTTCCCGTAGCGCTAGCCCTATTTCCGCGCCCGCCCGGGGCTGCGCGCTCATCACTGGCTTAACCTTCTCCAAGCGGCATATCGCTAGAACCCG  
GTCCCTCCAGTTACGATTTCCACAGTTGAAAAAATTTCTAAAAATAGCTTTAGAAAACCGGCTCGGATCTGTCCCAATAACTCCCTCCTAGCCAGCCTAC  
TCCCAAAGGATACCCCGGCGGTGAATGAAATTTACACATACCTCAAAACCCAGCCAGATCCCGTCCCGTCCCGCCACCCGCGCTCATCCC  
CCACCCAGACCCCGGATTTCTGATCCAAATCCCCCTCCTATGTTGAGCTACGCGCCCAAGTCTTCCAGTCATGACCCACATGTTGCCCTC  
CCAACCTAGCCCATGGAAATGAAAGCCTACAGCCATTAAGCAAGAGTCTCCAAGCAGCCCTGGAGCCCCAGTTTATCGACACCTACCGGCTT  
CGGTCAGCAGTTTGGCCCACTCCAAAGACCTCCAAAGACCTCCGAGCTGACGTACCTTTGCTCCCTCCCTGCGCTTCCCTCCATCACCAGCAGTATGATGC  
TTATATCGGAGGCCGAACCCGAGGTTATACAGTTATAACCCCTAGCCGCTCCCTCCGTTCCAAAGCCAAATCCCAACAACAAGGATTAAGCGGAGA  
ATACAGCAACTCTGGCTCGCCGCTTCCGCGCTTCCGAGGAGTCCCAAGACCCCTTCCGCGCTCTATCCGAGGCTGGAGGAGCCTTACCC  
GCCTCGTAGACCGCTCAACATAGCTTGTGACAATGGCTCCGAGAGGACCGCCAAAGACCCCATCTACGTTCTTACGCTACTCCATCAACAAAGT  
GAATGCCAAAATTACTACAGCCCGGAGACACTAATAGCCCTTAGGAGATATGTCGGGCTTGTGACAGCTGGACCCCAAGACCAAAACAAAGTG  
TTAGTTGTCCAGCTTAAAAACCCCGCCAAATAGCCGCTGCTCCGGTCCGGGAAAGCAGGCCACTGGAGTCGGGACTGCACTACGCTCCGCCCC  
CCGGCCATGCCCTATGTCAGACCCCACTACTGGAAGCGAGACTGCCCGCTTAAAGCCACTATCCCAAGCAGGACGACGAGGAGGAGGCTCCCTC  
CTATTAGACTTCCCGCTGACATCCCAACCCCAAAACCTCCATAGGCGGGGAGGTTTAACTCCCGCCACATACAGCAAGTCCCTTAAACAGAGCC  
AGCATATTTTCCGAGTTATACCGTTAGATCCCGCCCGCTCGGCGGTAATTAAGCCCAAGTTGACACCCAGACCCAGCCCAAGACTTCAAGGCTTTA  
CTAGATACAGGAGCAGACATGACAGTCTTCCGATAGCCTTGTCTCAAGTAATCTCCCTCAAAAAATACATCCGATATTAGGGCAGGGCCAAACCGA  
ATCACTTTAAGCTACCTCCCTTCCGTGCTAATAGCCTCCCTTCCGACACAGCCTATTGTTTAAATATCTTCCGATGTTATACCAAAACAACTGGGCCA  
TCATAGGTCGCGATGCTTCAACAAATGCCAGGCGCTCTGTACCTTCCGAGGCGCTTGTGAGGCTTGTGACAGCTGGACCCCAAGACCAAAAGTG  
GGCTAGAACACCTCCCAAGCCCGCCGAATAGCCAGTTCCTTAAACCCAGAACGCTCCAGGCTTGAACACTTGGTCCGAAAGGCCCTGGAGGCA  
GGCCATATGAACCTACACCCGACCCAGGAAATAACCCAGTATCCAGTAAAAAGGCCAATGAAACCTGGCGATTATCCACGACCTCGGGCCACTAAC  
TCTTAACCATAGATCTCTCATCATCTTCCCGCGGCCCTGACTTGTCCAGCCTGCCAACTACACTAGCCCATTTGCAAACTATAGACTTAAAGAGCCCT  
TTTTCAAAATCCCTTACCTAAACAGTTCCAGCCCTACTTTGCTTCACTGCTCCACAGCAGTGTAACTACGCGCCCGGCATAGATACGCTGGAAGGTA  
CCCAAGGTTTAAAAATGCTCCACCTTGTTCGAAATGACAGTCCGCTTACCTGACGCTTCCGCAAGCTTCCGCAAGCTTCCCAAGCTTCCGATCT  
GGATGACATTTCTCCGAGCCCTCCCATAGGACCTACTACTCTCAGAGGCCCAATGCTTCCCTAATCTCCCAAGGTTGCTGTGTCCGAAAA  
CAAAACCCAGCAAGCTTGAACAAATTAAGTTCCTAGGGCAAAATAGTTCAACCAACCTGACTTATGATGACGCTCCCAAGCTTCCGATGCTCCG  
TGGCGCTACCTGAACTTCAAGCCCTACTTGGCGAGATTGAGTGGTCTCAAGGGAACCTCTACCTTACGCCAGCCCTTCCAGTCTCTACTGTCCCTA  
CAAAGGCATAGTCCCGAGACCAATATTAATCCTTCTCAAGTTCAATATTAGTGCAGCTCGGGCAGCCCTGTACAGAACTGCCGAGTAGACT  
AGTCCAAACCTGCCCTTAGGGGCTATTATGCTGACCCCTACTTGTCCAGCCTGCCAACTACTGTAGTGTTCCAGTCCAAAGCAGCAGTGGCCACTTGT  
TGCCCTACCCCACTACCCACACTGACAGTGCCTCGGGGAGCTACTTGGCTCAGCTGTGTTTACTCGACAATAACACTGCAATCCATGGCTACTCTGC  
CAAACCCATCATAACACTTCCAGCCCAACCTTCAACCAATTTCAACCAACTGACCCACCTGACCCACCCAGTGTCCCTACTTACTCCACCACTACCCGAT  
GAATGAGTGCACCAACTGGAGAATTTGGAACACTTTTCAAAACAGCTGCCCTTGGCTCCTGTGAAAGCCCTCATGCCAGTTTACTCTTCCCGGG  
TGATCAAAAACCCGCCCTGCTGTTTTAGACGGATCTACCTCCGCGGACGCTATATTCTTGGGACAAAGCTATATTGTCAGAAAGTACTTCCCTCT  
CCGCCACCCAGCAAGTCCGCGCAACGGCCGAATCTCGGACTTTGATGGCTTCCAGCCCTTCCAGCCCGCTTCCGTCGCTGTCTCAACATTTCTAG  
CAAGGCTATCTTACTTATGACTTCCGACCTTGGCCCTAGGCACCTTCCAAGCGAGTCTCCTCAGGCCCTTCCAGGCCCTTCCGCGCTTACTACTG  
AAGTCGCTTATTTGACCCAGTTCGACAGCATAACCTATCCCTGATCCCATCTCCAGGCTCAACGCTCACAGATGCCCTACTAATACCCCTGTCTCG  
AGCTCTCTCCTGAGAACTACACAGTTTACCCTATGGGACAGAGGCCCTCACATGCAAGGGGCAACCAACTGAGGCTTCCAAATACCTCGCGCTT  
GCCACGCTCCGCCAAAATAACCCCAACATCAGATGCTCGGGGACACATCCGCGTGGCCACTTCCCTAACCCACATCTGGCAGGGCGACATACCCAT  
TCAATATAAAAATCACTGTATCGCTTCTATGATGGTAGACACTTAAACAGGCTTCCAGGACCATCTCAGCTACCCAAAAGAGAAAAGAAAGCTCAGAA  
CCTTCTTTGCTTAGGCCATTTGCTATCTAGGCAAGCTTAGCTACATAAACACAGACAAAGCCCTGCCTATATTTCCCAAGACTTCCAAATGTAGTACT  
CTTGCTATTGCGCATACTACCCATGTCCTTCAATCCAACAGCTCAGGACTGTAGAACGCTCTAATGGCATTCTTAAACCCCTATTATATAAGTCTTTACTG  
ACAAACCCGACCTCCCATGGATAATGCTCTATCCATAGCCCTTAGGACAATCAACCCCTGAATGTGTTAAACCACTGCCACAAAACCCGATGGCAGCTTCA  
CACTCCCGCCGACTCCAGCCGATCCAGACACTCCCTCAGCAATAAACCAACCCATTTGGTATTATTTCAAGTTTAAATAGCCCTGTTCTGACTGAC  
AAGGACACAGGAGGCTTCCAAGAAGCTCGCGGCGCTGCTCTATCCGGTAAGCGCTAGTTCTGCCAGTGGATCCCGTGGAGACTCCTCAAGGGAGC  
TGATGCCCAAGACCCGTCGGAGGCGCCCGGATCCCAAGAAAAGACCAACACCCATGGGTAAGTTTCTCGCCAATTTGATTTTCTTCCAGTTCT  
GCCCTCTATCTCGGTGATTACAGCCCAAGCTGCTGACTCTCAAAATTTGAGGTCCTCTCATACCCTTAAACCCCTGAATCCTCGCCAGCCAGTTGCTT  
GTGAGCCCTCGACCTCGCCGCTTTCAGCAGTACGCGCTTACACCCCTGCTTAACTTCTAGTAAAGTTACTCCAGCTACCTGACATTTCCCTAT  
CTATCCCTCATTGGATAAAAAGCCAAACCGAAATGGCGGAGGCTATTATTAGTCTCTTATTAGACCTTGTCTTAAAGTGGCCATACCTGGGTTGCCA  
ATCATGGACCTGTCCCTATAATGGGTTTTCCCTTCTCCCTTCTAGTGCAGCCTCCAGGATAGCCCATCTGGTTCTTAATACCGAACCAGCCCACTG  
CTCCACCCGCTTCTTACTCCCACTTCAACCTAGACCACTCTCGAGCCCTTATACCATGGAATCAAAACTCTGACCCCTGACCCCTTCCAGTTAACCC  
CAAAGCACTAATATACTGATTTGCTGTATCGATCGTGCAGCCTATCCACTTGGCAGCTCTATCCCAACGCTCTGTTCCATCTCTTCTTCTTACC  
CCCTCCTTTTACCATCGTTAGCGCTTCCAGCCCGCCACTCAGCTTACCTTACCTGGACCCACTGCTTGGACCCCACTCAAGCTTATGCTCTCTCC  
CCTGTATAAATCCCTCATCTCGCCCTTTTCCCTGTCACTTCCACCTTCCACCTAGGATCCCGCTCCCGCCGAGCGGTACCGGTTGGCGTGTGCT  
CCGCTGGCCTGGGAGCGGGGTTGCTGGCGGATTACGGCTTCCCTCGCTCAGGGAAGGAGCCTTACATGAGTGGAAAGATTTCT  
CCAATTAACCAAGCAATAGTCAAAAACCAAAAATCTACTCAAAATTTGCCAGTATGCTGCCAGAACGACGAGGCTTGTATCTCTGTCTGGGAGCAA  
GGAGGATTATGCAAGCATTACAAGAACAGTGTCTTTTCTGAATATTACTAATTTCCCATGCTCAATACTACAAGAAAGACCCCGCTGGAGAATCGAGTCT  
GACTGGCTGGGGCTTAACTGGGACCTTGGCTCTCACAGTGGGCTCGAAGGCTTACAAACTGGAATCACCCCTTGTCCGCTACTCCTTTCTGTTATCT  
TGCAGGACCATGATCCTCGTACGCTACGACACCTCCCTCGCGCTCAGATACCCCACTTACTCTTATAAACCCCTGAGTATCCCTGTAAACCAAGCAC  
ATAATTTGCAACCACTCGCTCCAGCCCTCCCTGCCAATAATTAACCTTCCCATTAATCCTCCTTCTCCTGCAGCACTTCCCTGCTCCGCTCCAA  
GACTCCACTCGCTTCCAATCTGTAGTATAGCCATCAATCCCAACTCTGCTGATTTTCTTCTTAGCACTATGCTGTTTCCGCTTCTCAGCCCTTGTCT  
CACTTGCCTCAGCGCTCCTGCTTCTCTTCTCCGCGCAGCTCAGCGCTTCTTCCGCGCGCTCCTGCGCGCTTCTCTCTCTCTCTCTCTCTCTCT  
CCTTTTCAAACTCAGCAATCTGCTTTTCTCTCTCTTCTCCCGCTCTTTTTTTCGCTTCTCTCTCTCAGCCCGTGCCTGCGGATCAGATGCTTTCC  
CGCGAGGTGGCGTTTTCTCCCTGGAGGGCCCGCTCGCAGCCGCGCGCGCTTCTCTTCTAAGGATAGCAAAACCGTCAAGCACAGCTTCTCTCTCT  
CTTGTCTTAACTCTTCCCAAGGATAATAGCCCGTCCACCAATTTCTCCACAGCAGGCTCCTCGGGCATGGCACAGGCAAGCATCGAAACAGCCCTAC  
AGATAAAAATTAACCTGCTTATATACGCCCACTTCCAGGGTTTGGACAGAGCTTCTTTTCCGATACCCAGTCTACGTTTGGAGACTGTGACAAAGC  
GACTGGTCCCTCTCTGAGGAGGACTGTTCCGCGCGCTACATCGTACGCGCTTCCATTAATCCTCCTTCTCCTGCAGCACTTCCCTGCTCCGCTCCGA  
TGGACGGTATACCGCTCAGCTTACAGTTCTTATCCTCGACTCCCTCTTCCCAACCCAGAGAACTTCCGAATGGATACATGGAACCCCACTTGGCAGC  
ACTCATAACCCCACTTCCACTTCCCTCCAGCCATGCGCAAACTCCCTTCCGAATGGATACATGGAACCCCACTTGGCAGCAGCTTCC  
CAACCTGTCTTTTCCAGACCCCGGACTCCGGCCCAAAAACCTGTACACCTCTGGGAGGCTCCGTTGTCTGCATGTACTTACCAGCTTACCAGCTTCC  
TCACTTCCGCTTCCGCTTCCGCTTCCGCTTCCGCTTCCGCTTCCGCTTCCGCTTCCGCTTCCGCTTCCGCTTCCGCTTCCGCTTCCGCTTCCGCT  
AAATTTCCCTTACCAACAGGGCTTAATAATTTTCAACGAGACTGTTGCCAACCCCTTTCCAGCTTATAGGGACCCGATCGAAACAGCCCTGGCA  
AAACGCTCTTCCGTTCCACTCAACCTCACCCTCCAGGCTTATTTGACATTTACCGATAGCAGCGCTATGATTTCCGGCCCTCCCTAAAGATGGC  
CAGCCTTTTACTACAGCTCCTCCTCTTATATTTCAAAATTTCAAAACCCAGGCTTACCACCCCTCATTCTACTCTCAGACCGCTTCCATACGACTCT  
CCTTTTCAATTTTACATCTCTGTTTGAAGAATACCAACATCCCAATTTCTACTTTTAAACGAAAAGAGGAGATGACATGACCATGAGCCCAATAT  
CCCCGGGGCTTAGAGCTCCAGTGA AAAACATTTCCGCGAAACAGAAGTCTGAAAAGTCAAGGCCCAGACTAAGCTGTAGCTTCCCGGGAGG  
GACAGCTAGCACCCGGCTCAGGCTAGGCCCTGACGTGTCCCTCGCAAGGACAAATATAAGCTCAGACTCCGGGAAAGCCAGCCAGCCACCCATTTCTCT  
CCATGTTTGTCAAGCCCGCTCAGCGCTGACGACAAACCCCTCACTCAAAAACATTTTTCATGGCAGCATATGGCTGAATAAATCAACAGAGTCTATAAAA  
GCGTGGAGACAGTTCAGGAGGAGGCTCGCATCTCTTCCAGCGCCCGCCCTTCCAGGCGGCTTCCAGGCGGCTTGAAGTGCAGCTTATGCTTCCGCG  
CTCCGCGCTGTGGTCTCCTGAACTCGCTCCGCGCTTAGGTAAGTTTAGAGCTCAGGTCAGGACCGGGCTTGTCCGCGGCTCTCTTGGAGCCTACT  
AGACTCAGCGGCTTCCAGCTTGTGCTGACCTGCTTGTCAACTGTGCTCAAGCTTTGTTTTCGTTTTCTGTTCTGCGTGCATGAGTGTCCACCC  
CTTCCCTTTCATTACGACTGACTGCCGCTTGGCCACGGCAAGTACCGGCGACTCCGTTGGCTGGAGCCAGCGACAGCCATTCTATAGCACTCTC  
CAGGAGAGAACTTAGTACAC

# Supplemental Fig. 1

A

```

1' MGKFLATLIL FFQFCPLIFG DYSpscctLT IGVSSyHskP CNPAQpVCSW TLDLLALSAD
*****
1" MGKFLATLIL FFQFCPLILG DYSpscctLT IGVSSyHskP CNPAQpVCSW TLDLPALSAD

61' QALQPPcPNL VSYSSyHATY SLYLFPPhWTK KPNRNgGgYy SASySDpCSL KcPYLgCQSW
***,*****
61" QALHPPcPNL VSYSSyHATY SLYLFPPhWIK KPNRNgGgYy SVSySDpCSL KcPYLgCQSW

121' TCPyTGAVSS PYWKFQHDVN FTQEVsRLNI NLHfSKCGFP FSLlVDAPGY DpIWfLNTEP
****
121" TCPY-----KCGFP FSLlVDAPGY DpIWfFNTEP

181' SQLPPTAPPL LPHSNLDHIL EPsIPWkSKL LTLVQLTLQs TNYTCIVCID RASLSTWHVL
*****
150" SQLPPTAPPL LPHSNLDHIL EPsIPWkSKL LTLVQLTLQs TNYTCIVCID RASLSTWHVL

241' YSPNVsVPSS SSTPLLYPSL ALPAPHLTLp FNWTHCFDPQ IQAIVSSpCh NSLILPPFSL
*****
210" YSPNVsVPSS SSTPLLYPSL ALPAPHLTLp FNWTHCFDPQ IQAIVSSpCh NSLILPPFSL

301' SPVPTLGSRS RRAVPVAVWL VSALAMGAGV AGGITGSMsL ASGKsLLHEV DkDISQLTQA
*****
270" SPVPTLGSRS RRAVPVAVWL VSALAMGAGV AGGITGSMsL ASGKsLLHEV DkDISQLTQA

361' IVKNHKNLLK IAQYAAQNRR GLDLLFWEQg GLCKALQEQC RFPNITNSHV PILqERPPLE
*****
330" IVKNHKNLLK IAQYAAQNRR GLDLLFWEQg GLCKALQEQC CFLNITNSHV SILqERPPLE

421' NRVLtGWGLN WDLGLSQWAR EALQTGITLV ALLLLVILAG PCILRQLRHL PSRVRYPHYS
*****
390" NRVLtGWGLN WDLGLSQWAR EALQTGITLV ALLLLVILAG PCILRQLRHL PSRVRYPHYS

481' LIKPESSL
**,*
450" LINPESSL
450" LINPESSL
  
```

**1st Amino Acid Sequence**

File Name : ATK-1 Env\_1AA  
Sequence Size : 488

**2nd Amino Acid Sequence**

File Name : TL-Om1 Env\_1AA  
Sequence Size : 457

Unit Size to Compare : 2

Percent Similarity : 99.3(447/457)

Percent Identity : 97.8(454/457)

Env amino acid sequence domains

1-21 SP

21-313 SU

**21-179 receptor binding domain (RBD)**

180-215 proline-rich region (PRR)

215-313 SU C-term

313-488 TM 446-465 tm

Env sequence of HTLV-1 provirus isolated from TL-Om1 cells

Complete sequence of HTLV-1 from TL-Om1 cells showed 93 nt (31 aa) inframe deletion in the env sequence. A.

Comparison of the env sequences to ATK-1. The deleted region contained aa125-155 of ATK-1 Env and was located in the RBD.

Supplemental Table 1. Genomic long PCR primers

| Forward Name | sequence                    | Reverse Name | Sequence                  | size (base) | regions                          |
|--------------|-----------------------------|--------------|---------------------------|-------------|----------------------------------|
| 5' gPCR 1F   | CAGTTCCCATGATCTGAGTCTAGGTCC | 41R          | GGGAGGTGAGCTTAAAGTGATCTT  | 3964        | 5' integration site, LTR, coding |
| 18F          | CCAAGTCCTTCCAGTCATGCA       | 188R         | ATGGTCATTGTCATCTGCCTCTTT  | 6950        | coding                           |
| 174F         | TGGACAGAGTCTTCTTTTCGGATAC   | 3' gPCR 2R   | ACAAAAGCAGGAGGCGTCACACTAC | 4065        | LTR, 3' integration site         |

Supplemental Table 2. Primers for sequencing analysis

| Name                                            | Sequence                  | Name      | Sequence                     |
|-------------------------------------------------|---------------------------|-----------|------------------------------|
| <b>Determination of HTLV-1 integration site</b> |                           |           |                              |
| 5'-seq 1F                                       | GGGAACATGGATGGAGCTAG      | 5'-seq 2F | CTTATAAGTGGGAGCTAAATGATGAG   |
| 5'-seq 3F                                       | ATCTTGCTGCTGCTCATTG       | 5'-seq 4F | ACTCCATTTGCCTTCCCTC          |
| 70F                                             | ACAAATACACCTTGCAATCCTATGG | 78F       | CACCTCCCAGGCAGCCTATA         |
| 101F                                            | TGCCTATATTTCCCAAGACTTCCT  | 5R        | TCAGTCGTGAATGAAAGGGAAAG      |
| 18R                                             | CGCTTGGGAGACTTCTTGCT      |           |                              |
| <b>Determination of HTLV-1 sequence</b>         |                           |           |                              |
| 18F                                             | CCAAGTCCTTCCAGTCATGCA     | 18R       | CGCTTGGGAGACTTCTTGCT         |
| 20F                                             | CCCCAGTTTATGCAGACCAT      | 20R       | CCACGAGGGAGGAGCAAA           |
| 33F                                             | AATGCAAACAAAGAATGCCAAAA   | 33R       | GGCTGGACAACAACTTTGGT         |
| 41F                                             | ACAGTCCTTCCGATAGCCTTGTT   | 41R       | GGGAGGTGAGCTTAAAGTGATCTT     |
| 47F                                             | TCGTGATGCCTTACAACAATGC    | 47R       | GGAGGTGTTCTAGCCCAAGGA        |
| 60F                                             | CCGAAAACAAAACCCAGCAA      | 60R       | CCAGCGGGACCGTATAGGTA         |
| 70F                                             | ACAAATACACCTTGCAATCCTATGG | 70R       | GGGTGGTCAGATGTTTGAATGA       |
| 84F                                             | CCTGCCCGCTTACTATCG        | 84R       | GGCATCTGTGAGAGCGTTGA         |
| 101F                                            | TGCCTATATTTCCCAAGACTTCCT  | 101R      | TTCTACAAGTCCGGAGCTGGTT       |
| 111F                                            | CCCCTCATCCTCGGTGATTAC     | 111R      | CGAGGGTCCATGAACAAACTG        |
| 120F                                            | CATTGGATCAAAAAGCCAAACC    | 120R      | ATGATTGGCACCCCTAGGTATGG      |
| 139F                                            | CACTGCTTTGACCCCGAGAT      | 139R      | GGATCCTAGCGTGGGAACAG         |
| 156F                                            | GCATCCTCCGTCAGCTACGA      | 156R      | TTGCAATAATTGTGTGCTTGGTTT     |
| 161F                                            | CCTCGCCTTCCAAGTGTCTAGTA   | 161R      | TGAGCGCAAGTGGAGACAAG         |
| 174F                                            | TGGACAGAGTCTTCTTTTCGGATAC | 174R      | TAGGCGGGCCGAACATAG           |
| 180F                                            | GGCCTTCCCTACCAATGTTC      | 180R      | GCAAACAGTCCTCGGGTAGAAT       |
| 187F                                            | CAAGGCCTACCACCCTCAT       | 188F      | GTACTCTTCCTTTCATAATTTGCATCTC |
| 3'-1R                                           | ACAAAAGCAGGAGGCGTCACACTAC |           |                              |

Supplemental Table 3. Summary of gene copy numbers (N) determined in this report.

| Method        | Cells  | Target genes |             |      |      |      |       |        |      |      |
|---------------|--------|--------------|-------------|------|------|------|-------|--------|------|------|
|               |        | RPPH1        | ALB         | ACTB | CD81 | HBB  | RAG-1 | HTLV-1 | LTR  |      |
| FISH          | TL-Om1 | <u>3.95</u>  | 3           | -    | -    | -    | -     | 1.8    | -    |      |
|               | Jurkat | 2            | 2           | -    | -    | -    | -     | -      | -    |      |
| Digital PCR   | TL-Om1 | <u>3.95</u>  | 2.93        | -    | -    | -    | -     | 2.00   | -    |      |
|               | Jurkat | <u>2</u>     | 1.72        | -    | -    | -    | -     | -      | -    |      |
|               | PBMC1  | 2            | 2.17        | -    | -    | -    | -     | -      | -    |      |
|               | PBMC2  | 2            | 1.99        | -    | -    | -    | -     | -      | -    |      |
| q-PCR Plasmid | TL-Om1 | Mean         | <u>3.95</u> | 2.94 | -    | -    | -     | -      | 1.91 | 4.01 |
|               |        | SD           | -           | 0.01 | -    | -    | -     | -      | 0.06 | 0.18 |
|               | Jurkat | Mean         | <u>2</u>    | 1.84 | -    | -    | -     | -      | -    | -    |
|               |        | SD           | -           | 0.04 | -    | -    | -     | -      | -    | -    |
| q-PCR gDNA    | TL-Om1 | Mean         | <u>3.95</u> | 2.92 | 4.65 | 3.99 | 3.65  | 3.71   | -    | -    |
|               |        | SD           | -           | 0.02 | 0.03 | 0.02 | 0.01  | 0.01   | -    | -    |
|               | Jurkat | Mean         | <u>2</u>    | 1.90 | 2.14 | 1.98 | 1.79  | 2.16   | -    | -    |
|               |        | SD           | -           | 0.01 | 0.02 | 0.01 | 0.01  | 0.02   | -    | -    |
|               | PBMC 1 | Mean         | 2           | 1.98 | 1.99 | 1.96 | 1.98  | 2.00   | -    | -    |
|               |        | SD           | -           | 0.01 | 0.04 | 0.03 | 0.02  | 0.01   | -    | -    |
|               | PBMC 2 | Mean         | 2           | 2.02 | 2.02 | 1.98 | 2.00  | 2.02   | -    | -    |
|               |        | SD           | -           | 0.04 | 0.05 | 0.04 | 0.05  | 0.04   | -    | -    |

Underlined number is the result from FISH analysis.

$N = (\text{FISH}) \times 2^{-\Delta\text{Ct}}$ ,  $\Delta\text{Ct} = \text{Ct}(\text{Target gene}) - \text{Ct}(\text{RPPH1})$
